# Supplementary material
Source: Research Square preprint supplement (doi:10.21203/rs.3.rs-9025367/v1)
Supplement: Supplementary file 1 [file 25db1c402cdcb11ca62cd265.docx]

**Content**

[**I. Inclusion and Exclusion criteria** 2](#_Toc214365697)

[**1. Included criteria:** 2](#_Toc214365698)

[**2. Excluded criteria:** 2](#_Toc214365699)

[**II. Dose assigned** 3](#_Toc214365700)

[**III. Model Used in Dose-Response Meta-Analysis** 3](#_Toc214365701)

[**1)** **Linear Model used in Dose-response Meta-Analysis** 3](#_Toc214365702)

[**2)** **Quadratic Model used in Dose-response Meta-Analysis** 3](#_Toc214365703)

[**3)** **Cubic spline Model used in Dose-response Meta-Analysis** 4](#_Toc214365704)

[**IV. Statistical software** 4](#_Toc214365705)

[Reference 5](#_Toc214365706)

**I. Inclusion and Exclusion criteria**

**1. Included criteria:**

1) Population: General female adults.

2) Exposure: A history of pregnancy/childbirth, including full term pregnancies, multiple pregnancies, parity or number of births, and age at first pregnancy/childbirth.

3) Comparation: Same population with a similar history of pregnancy but without cancer.

4) Outcome: Cancer occurrence.

5) Design: Cohort or Case-Control studies and provide enough information for estimating association between exposure and outcome using odds ratio (OR), risk ratio (RR), or hazard ratio (HR).

**2. Excluded criteria:**

1) Population

1. Female patients get a diagnosis of cancer before and during pregnancy.
2. Premenopausal or postmenopausal women.
3. Female carriers of specific genes at high risk for certain types of cancer, for example BRCA1/BRCA2.
4. Women have been suffered from a particular disease, such as HIV, Systemic lupus erythematosus and diabetes mellitus.
5. Subjects are not general adult women, for example child.

2) Exposure

1. Women have special historical or occupational exposure.

3) Outcome

a. The study outcome is cancer recurrence.

4) Study design

1. Modeling analysis

5) Publication Type

a. Review, comments, conference abstract or editorial without original data.

**II. Dose assigned**

For studies reporting exposure as an interval, the assigned dose was defined as follows: 1

1. For closed intervals, the midpoint of the lower and upper bounds was used.
2. For open-ended highest categories, the dose was assumed to be the same width as the preceding interval.

For open-ended lowest categories, the dose was calculated by subtracting half of the width of the adjacent interval from the specified lowest value.

**III. Model Used in Dose-Response Meta-Analysis**

We firstly plotted a scatter diagram of dose-effect sizes (ES), then fitted linear, quadratic, and cubic spline models (with knots at the 10th, 50th, and 90th percentiles). Akaike Information Criterion (AIC) was calculated, where the model with the smallest AIC was considered optimal.2 If competing models had AIC differences of <2 compared to the optimal model, preference was given to the simplest model (linear > quadratic > cubic spline) to ensure parsimony.

1. **Linear Model used in Dose-response Meta-Analysis**

logRR=*β*0​+*β*1​×dose

logRR: Logarithm of the relative risk, indicating the linear relationship between exposure dose and outcome risk.

*β*0​: Intercept, representing the log relative risk when the exposure dose is zero.

*β*1​: Slope, indicating the change in log relative risk per unit increase in dose.

dose: Exposure dose, representing the level of exposure for individuals or groups.

1. **Quadratic Model used in Dose-response Meta-Analysis**

logRR=*β*0​+*β*1​×dose+*β*2​×dose2

logRR: Logarithm of the relative risk.

*β*0​: Intercept, representing the log relative risk when the exposure dose is zero.

*β*1​: Linear term coefficient, indicating the linear effect of dose.

*β*2​: Quadratic term coefficient, capturing the non-linear effect of dose and allowing for a curvilinear relationship between dose and risk.

dose: Exposure dose.

dose2: Square of the dose, used to describe the non-linear relationship between dose and risk.

1. **Cubic spline Model used in Dose-response Meta-Analysis**

logRR=*β*0​+*β*1​×dose+*β*2​×rcs(dose, knots)

logRR: Logarithm of the relative risk.

*β*0​: Intercept, representing the log relative risk when the exposure dose is zero.

*β*1​: Linear term coefficient, indicating the linear effect of dose.

*β*2​: Spline coefficient, capturing the non-linear effect of dose through the restricted cubic spline function.

dose: Exposure dose.

rcs(dose, knots): Restricted cubic spline function, where knots are predefined points that divide the range of dose into segments, allowing for a flexible and piecewise representation of the dose–response relationship.

**IV. Statistical software**

All analyses in this study were conducted using R (version 4.3.3). For meta-analysis, it was mainly based on the "meta" package in R (version 8.4-2), and for dose-response meta-analysis, it was mainly based on the "dosresmeta" package in R (version 2.0.1). A statistically significant difference was considered to exist when *P* < 0.05.

Reference

1. Hartemink N, Boshuizen HC, Nagelkerke NJ, Jacobs MA, van Houwelingen HC. Combining risk estimates from observational studies with different exposure cutpoints: a meta-analysis on body mass index and diabetes type 2. *Am J Epidemiol* 2006; **163**(11): 1042–52.

2. Arnold TW. Uninformative Parameters and Model Selection Using Akaike's Information Criterion. *Journal of Wildlife Management* 2010; **74**(6): 1175–8.
