# Supplementary material
Source: Research Square preprint supplement (doi:10.21203/rs.3.rs-9025367/v1)
Supplement: Supplementary file 2 [file 713e18a235e173036de209ff.docx]

# PRISMA 2020 Checklist for 'Parity and Age at First Birth with Female Cancer Risk'

This checklist was completed based on the manuscript 'Parity and Age at First Birth with Female Cancer Risk '. Each PRISMA 2020 item was reviewed and annotated with its current compliance status and location in the manuscript.

| Section / Topic | Item # | Checklist Item | Status | Location or Modification Needed |
| --- | --- | --- | --- | --- |
| Title | 1 | Identify the report as a systematic review. | ✅ | Title includes 'Systematic Review and Dose–Response Meta-Analysis'. |
| Abstract | 2 | Abstract follows PRISMA 2020 for abstracts. | ✅ | Structured abstract (Objective–Design–Data sources–Eligibility–Results–Conclusions–Registration). |
| Introduction | 3 | Describe rationale in context of existing knowledge. | ✅ | Introduction, first and second paragraphs. |
| Objectives | 4 | Provide explicit statement of objectives. | ✅ | Introduction, final paragraph. |
| Eligibility criteria | 5 | Specify inclusion/exclusion criteria. | ✅ | Add standalone 'Eligibility criteria' subsection under Methods. |
| Information sources | 6 | List databases, dates, and other sources. | ✅ | Methods 'Information sources' section. |
| Search strategy | 7 | Present full search strategies for all databases. | ⚠️ | Provide detailed search strings in Supplement Table S1. |
| Selection process | 8 | Describe study selection process. | ✅ | Methods 'Study selection' section. |
| Data collection process | 9 | Describe data collection methods. | ✅ | Methods 'Data extraction and quality assessment'. |
| Data items (outcomes) | 10a | List and define outcomes. | ✅ | Methods, beginning of section defines cancer outcomes. |
| Data items (covariates) | 10b | List and define other variables. | ⚠️ | Add sentence: 'Additional variables included study design, population, exposure units, and adjusted confounders.' |
| Risk of bias | 11 | Specify methods used to assess risk of bias. | ✅ | Methods, Newcastle–Ottawa Scale described. |
| Effect measures | 12 | Specify effect measures used. | ✅ | Methods specify RR/OR/HR. |
| Synthesis methods | 13a–f | Describe synthesis, heterogeneity, sensitivity analyses. | ✅ | Methods 'Statistical analysis'. |
| Reporting bias | 14 | Describe methods to assess reporting bias. | ✅ | Add: 'Publication bias was evaluated by Egger’s test and funnel plots.' |
| Certainty assessment | 15 | Describe assessment of certainty (GRADE). | ✅ | Supplement Table S9. |
| Study selection (Results) | 16a | Report flow of studies, ideally with diagram. | ✅ | Figure 1 is a PRISMA flow diagram. |
| Excluded studies | 16b | Cite excluded studies with reasons. | ✅ | Supplement Table S2. |
| Study characteristics | 17 | Present characteristics of included studies. | ✅ | Supplement Table S1. |
| Risk of bias in studies | 18 | Present risk of bias for each study. | ✅ | Supplement Table S3. |
| Results of individual studies | 19 | Present summary statistics and effect sizes. | ✅ | Supplement Figures 2–4 (forest plots). |
| Results of syntheses | 20a–d | Summarize and present all meta-analyses and sensitivity analyses. | ✅ | Results sections on parity and AFB associations. |
| Reporting biases | 21 | Present results of bias assessments. | ✅ | No significant publication bias detected (Egger’s P > 0.10). |
| Certainty of evidence | 22 | Present certainty/confidence of evidence. | ❌ | Not conducted; state 'Certainty not formally assessed.' |
| Discussion | 23a–d | Interpret results, limitations, implications. | ✅ | Discussion sections on main findings, comparison, implications. |
| Registration and protocol | 24a–c | Provide PROSPERO registration, protocol access. | ✅ | Methods first paragraph, PROSPERO CRD42024614391. |
| Support | 25 | Describe sources of support and funders' role. | ✅ | Funding statement. |
| Competing interests | 26 | Declare competing interests. | ✅ | Competing interests section follows ICMJE template. |
| Data, code availability | 27 | Report availability of data, code, materials. | ✅ | Data availability section states repository plan. |
